# Supplementary material for: Disentangling the Taxonomy, Systematics, and Life History of the Spider-Parasitic Fungus Gibellula (Cordycipitaceae, Hypocreales)
Source: MDPI journal article supplement (doi:10.3390/jof9040457), 2023-04-08
Supplement: s1 [file s1]

# Disentangling the taxonomy, systematics and life history of the spider-parasitic fungus *Gibellula* (Cordycipitaceae, Hypocreales)

## Supplementary Materials

PRISMA 2020 flow diagram for new systematic reviews which included searches of databases, registers and other sources

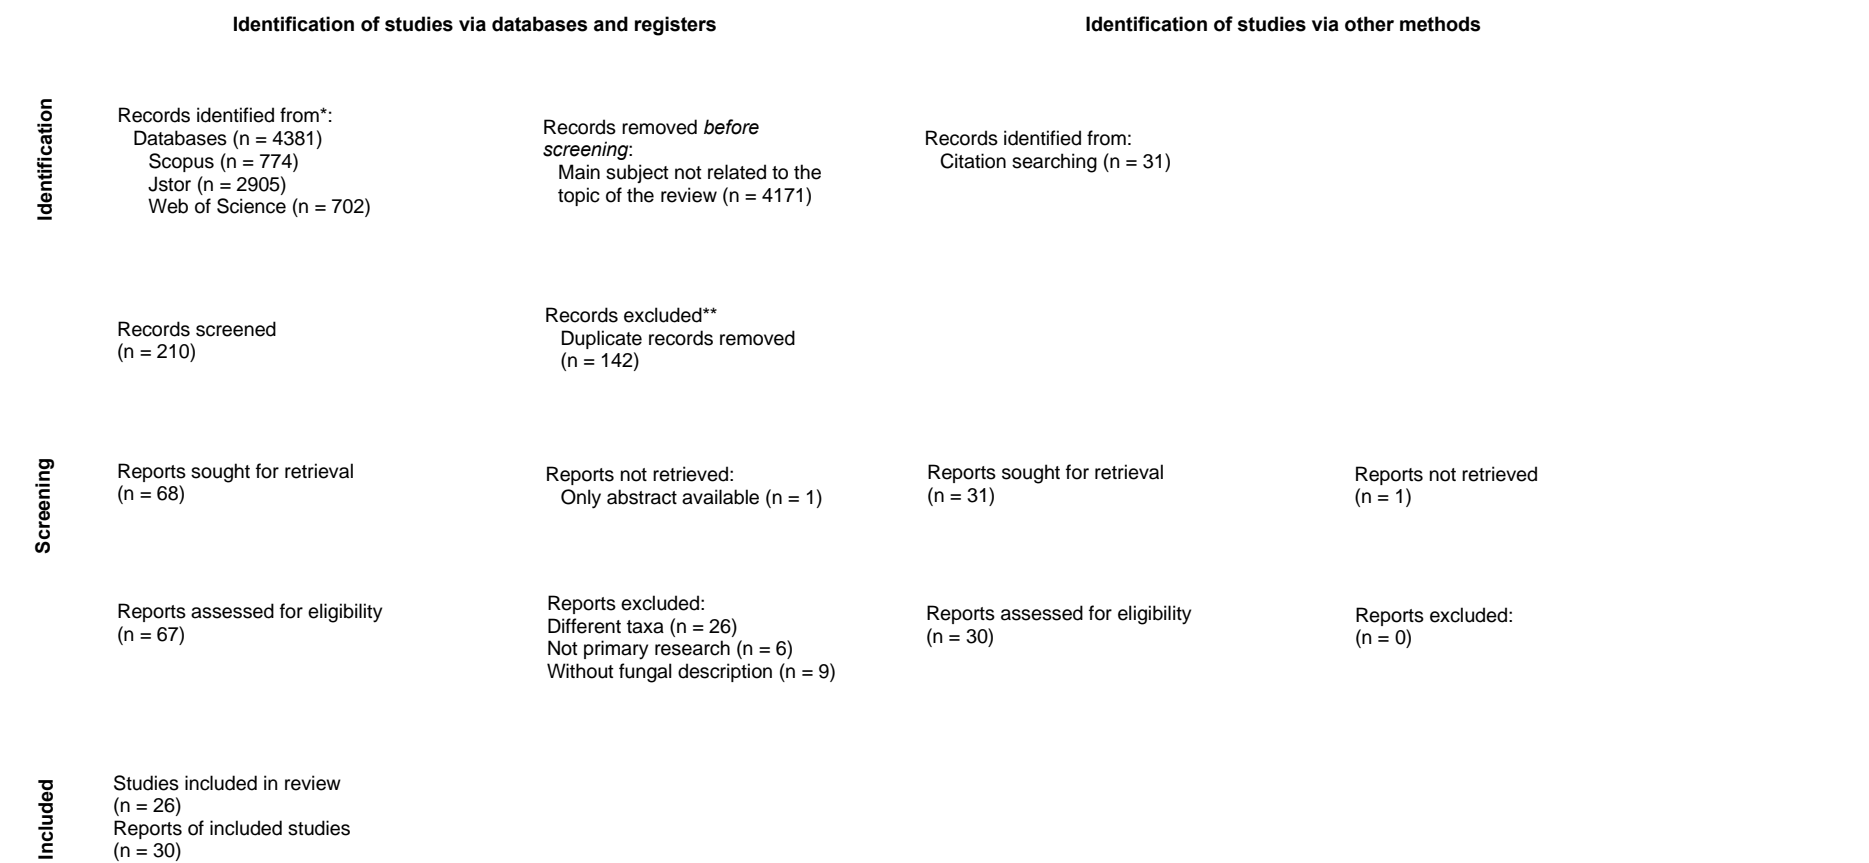

**Figure S1.** Global view of the records through database searching. The PRISMA diagram shows the main results of the searches for papers that presented interactions between entomopathogenic fungi and spiders, and the fungal morphological description. We conducted the literature searches from July to November 2022 at the databases *Web of Science – Core collection*, *Scopus* (Elsevier), and *JSTOR*, according to the suggested flow-chart for the literature selection process by PRISMA protocol [1].

**Table S1.** Primers used for amplification of each genomic region to identify the specimens of *Gibellula* sp.

| Genomic region | Estimated size (bp) | Primers (sequence 5' → 3')        | References |
|----------------|---------------------|-----------------------------------|------------|
| SSU            | 900-1000            | NS1 (GTAGTCATATGCTTGTCTC)         | [2]        |
|                |                     | NS4 (CTTCCGTCAATTCCTTTAAG)        |            |
| ITS            | 600-700             | ITS5 (GGAAGTAAAAGTCGTAACAAGG)     | [2]        |
|                |                     | ITS4 (TCCTCCGCTTATTGATATGC)       |            |
| LSU            | 800-900             | LR7 (TACTACCACCAAGATCT)/LR5       | [3]        |
|                |                     | (ATCCTGAGGGAACTTC)                |            |
|                |                     | LR0R (ACCCGCTGAACTTAAGC)          | [4]        |
| TEF            | 700-950             | 2218R (ATGACACCRACRGCACRGTYTG)    | [5]        |
|                |                     | 983F (GCYCCYGGHCAYCGTGAYTTYAT)    |            |
| RPB1           | 600-800             | RPB1-Ac (GARTGYCCDGGDCAYTTYGG)    | [6]        |
|                |                     | RPB1-Cr (CCNGCDATNTCRTTRTCCATRTA) |            |
| RPB2           | 900-1000            | fRPB2-5F (GAYGAYMGWGATCAYTTYGG)   | [7]        |
|                |                     | fRPB2-7cR (CCCATRGCTTGTYRCCCAT)   |            |

**Table S2.** PCR conditions for amplification of each genomic region to identify the specimens of *Gibellula*

| Genomic regions | Denaturation    | Annealing 1                                           | Annealing 2                                              | Final extension | References |
|-----------------|-----------------|-------------------------------------------------------|----------------------------------------------------------|-----------------|------------|
| SSU and LSU     | 95 °C for 2 min | 4 × (95 °C for 30 s, 55 °C for 30 s, 72 °C for 1 min) | 35 × (95 °C for 30 s, 50.5 °C for 30 s, 72 °C for 1 min) | 72 °C for 5 min | [8]        |

|                     |                  |                                                        |                                                        |                  |             |
|---------------------|------------------|--------------------------------------------------------|--------------------------------------------------------|------------------|-------------|
| <b>ITS</b>          | 95 °C for 2 min  | 35 × (95 °C for 1min, 58 °C for 30 s, 72 °C for 1 min) | –                                                      | 72 °C for 5 min  | [2]         |
| <b>TEF and RPB1</b> | 95 °C for 2 min  | 10 × (95 °C for 30 s, 64 °C for 30 s, 72 °C for 1 min) | 35 × (95 °C for 30 s, 54 °C for 30 s, 72 °C for 1 min) | 72 °C for 5 min  | [8]         |
| <b>RPB2</b>         | 95 °C for 10 min | 40 × (95 °C for 30s, 51.9 °C for 30s, 72 °C for 1min)  | –                                                      | 72 °C for 10 min | [7] adapted |

**Table S3.** Morphological comparison of structures from specimens without molecular data available collected at the Brazilian Atlantic Rainforest and the original descriptions of *Gibellula* sp. used for nMDS analyses (available at the Github repository [https://github.com/LBMCF/gibellula\\_review/TableS3\\_morphologicaltraits](https://github.com/LBMCF/gibellula_review/TableS3_morphologicaltraits)).

**Table S4.** Specimens from *Gibellula* sequenced in this study (LBMCF in bold) and sequences of *Gibellula* and Cordycipiceae species from NCBI-GenBank databases used in phylogenetic analyses and their associated voucher numbers. \* Type species; \*\*Lectotype species.

| Species name on GenBank    | Voucher numbers           | GenBank Accession Numbers |      |          |          |          |          |
|----------------------------|---------------------------|---------------------------|------|----------|----------|----------|----------|
|                            |                           | RPB2                      | RPB1 | SSU      | ITS      | TEF      | LSU      |
| <i>Gibellula mirabilis</i> | <b>LBMCF2020.01</b>       | n/a                       | n/a  | OQ585782 | OQ589479 | OQ658385 | OQ585972 |
| <i>G. pulchra</i>          | <b>LBMCF2020.02</b>       | n/a                       | n/a  | OQ585783 | n/a      | OQ658386 | OQ585973 |
| <i>G. pulchra</i>          | <b>LBMCF2020.03</b>       | n/a                       | n/a  | OQ585784 | OQ589480 | OQ658387 | OQ585974 |
| <i>G. pulchra</i>          | <b>LBMCF2020.07</b>       | n/a                       | n/a  | OQ585785 | n/a      | OQ658388 | OQ585975 |
| <i>G. mirabilis</i>        | <b>LBMCF2021.70</b>       | n/a                       | n/a  | OQ585786 | OQ589481 | OQ658389 | OQ585976 |
| <i>G. mirabilis</i>        | <b>LBMCF2021.80</b>       | n/a                       | n/a  | OQ585787 | OQ589482 | OQ658390 | OQ585977 |
| <i>G. leiopus</i>          | <b>LBMCF2022.86</b>       | n/a                       | n/a  | OQ585788 | OQ589483 | OQ658391 | n/a      |
| <i>G. mainsii</i>          | <b>LBMCF2022.96</b>       | n/a                       | n/a  | OQ585789 | OQ589484 | OQ658392 | n/a      |
| <i>G. leiopus</i>          | <b>LBMCF2022.98</b>       | n/a                       | n/a  | OQ585790 | OQ589485 | OQ658393 | n/a      |
| <i>G. leiopus</i>          | <b>LBMCF2022.99</b>       | n/a                       | n/a  | OQ585791 | OQ589486 | OQ658394 | OQ585978 |
| <i>G. mirabilis</i>        | <b>LBMCF2022.107</b>      | n/a                       | n/a  | OQ585792 | n/a      | OQ658395 | OQ585979 |
| <i>G. leiopus</i>          | <b>EBSL08 (LBMCF0011)</b> | OL117024                  | n/a  | OK329882 | OQ589488 | OK392621 | OK329878 |
| <i>G. leiopus</i>          | <b>EBSL13 (LBMCF0001)</b> | n/a                       | n/a  | OK329879 | OK329883 | OK392625 | OK329874 |

|                                        |                         |          |          |          |          |          |          |
|----------------------------------------|-------------------------|----------|----------|----------|----------|----------|----------|
| <i>G. pulchra</i>                      | <b>LBMCF2022.GA</b>     | n/a      | n/a      | OQ585780 | n/a      | OQ658383 | OQ585970 |
| <i>G. pulchra</i>                      | <b>LBMCF2022.GB</b>     | n/a      | n/a      | OQ585781 | OQ589487 | OQ658384 | OQ585971 |
| <i>Gibellula aurea</i>                 | 1PACOTI<br>(LBMCF0003)  | OL117022 | n/a      | OK329880 | n/a      | OK392618 | OQ585967 |
| <i>G. aurea</i>                        | 2PACOTI<br>(LBMCF0004)  | OL117023 | n/a      | OK329881 | n/a      | OK392619 | OQ585968 |
| <i>G. aurea</i>                        | 3PACOTI<br>(LBMCF0005)  | n/a      | n/a      | n/a      | n/a      | OQ658382 | OQ585969 |
| <i>G. aurea</i>                        | 25PACOTI<br>(LBMCF0006) | OK315662 | n/a      | n/a      | n/a      | OK392624 | OK329875 |
| <i>G. aurea</i>                        | 26PACOTI<br>(LBMCF0007) | OK315663 | n/a      | n/a      | OK329885 | OK392622 | OK329876 |
| <i>G. brevistipitata</i>               | BCC57817                | n/a      | OK040715 | n/a      | OK040729 | OK040697 | OK040706 |
| <i>G. cebrennini</i>                   | BCC32072                | n/a      | n/a      | n/a      | MT477067 | MT503326 | n/a      |
| <i>G. cebrennini</i>                   | BCC53551                | n/a      | n/a      | n/a      | MT477068 | MT503327 | n/a      |
| <i>G. cebrennini</i>                   | BCC53605                | MT503336 | MT503321 | n/a      | MT477069 | MT503328 | MT477062 |
| <i>G. cebrennini</i>                   | BCC39705                | MH521859 | MH521822 | n/a      | MH532874 | MH521895 | MH394673 |
| <i>G. clavulifera</i>                  | GZUIFR-HN0801           | n/a      | n/a      | n/a      | KJ857269 | n/a      | n/a      |
| <i>G. clavulifera</i>                  | 1                       | n/a      | n/a      | n/a      | KP685596 | n/a      | n/a      |
| <i>G. clavulifera</i> var. <i>alba</i> | ARSEF1915               | DQ522467 | DQ522408 | DQ522562 | JN049837 | DQ522360 | DQ518777 |
| <i>G. dimorpha</i>                     | BCC47518                | MH521863 | MH521819 | n/a      | MH532884 | MH521892 | MH394679 |
| <i>G. flava</i>                        | GNJ20200814-46          | n/a      | MW980146 | MW969660 | n/a      | MW961413 | MW969673 |
| <i>G. flava</i>                        | WFS20190625-25          | n/a      | MW384883 | MW036749 | n/a      | MW091325 | MW084343 |
| <i>G. formosana</i>                    | 1                       | n/a      | n/a      | n/a      | AB100360 | n/a      | n/a      |
| <i>G. fusiformispora</i>               | BCC56802                | MT503337 | MT503322 | n/a      | MT477070 | MT503329 | MT477063 |
| <i>G. fusiformispora</i>               | BCC45076                | MH521860 | MH521823 | n/a      | MH532882 | n/a      | n/a      |
| <i>G. gamsii</i>                       | BCC25798                | n/a      | MH152550 | n/a      | MH152532 | MH152563 | MH152542 |
| <i>G. gamsii</i>                       | BCC27968                | n/a      | MH152547 | n/a      | MH152529 | MH152560 | MH152539 |
| <i>G. gamsii</i>                       | BCC27970                | n/a      | MH152548 | n/a      | MH152530 | MH152561 | MH152540 |
| <i>G. gamsii</i>                       | BCC28797                | MH152557 | MH152549 | n/a      | MH152531 | MH152562 | MH152541 |
| <i>G. gamsii</i>                       | BCC29228                | MH152558 | MH152551 | n/a      | MH152533 | MH152564 | MH152543 |
| <i>G. gamsii</i>                       | BCC30396                | n/a      | MH152553 | n/a      | MH152535 | MH152566 | n/a      |

|                           |                |          |          |          |           |          |          |
|---------------------------|----------------|----------|----------|----------|-----------|----------|----------|
| <i>G. gamsii</i>          | BCC30397       | n/a      | MH152554 | n/a      | MH152536  | MH152567 | n/a      |
| <i>G. gamsii</i>          | BCC30449       | MH152559 | MH152552 | n/a      | MH152534  | MH152565 | MH152544 |
| <i>G. gamsii</i>          | BCC42026       | n/a      | MH152555 | n/a      | MH152537  | MH152568 | MH152545 |
| <i>G. gamsii</i>          | BCC47868       | MH152556 | MH152546 | n/a      | n/a       | n/a      | MH152538 |
| <i>G. gamsii</i>          | EPF034         | n/a      | n/a      | n/a      | JX192720  | JX192817 | JX192753 |
| <i>G. leiopus</i>         | BCC 16025      | n/a      | MF416649 | MF416602 | n/a       | MF416492 | MF416548 |
| <i>G. leiopus</i>         | BCC49250       | OK070784 | OK070783 | n/a      | OK070780  | OK070782 | OK070781 |
| <i>G. longicaudata</i>    | BCC40861       | OK040724 | OK040716 | n/a      | OK040730  | OK040698 | OK040707 |
| <i>G. longispora</i>      | GNJ20210710-02 | OL981635 | n/a      | OL854201 | n/a       | OL981628 | OL854212 |
| <i>G. longispora</i>      | GNJ20200813-16 | n/a      | MW980145 | n/a      | n/a       | MW961414 | n/a      |
| <i>G. longispora</i>      | NHJ 12014      | EU369075 | EU369055 | EU369098 | n/a       | EU369017 | n/a      |
| <i>G. nigelii</i>         | NHJ 10808      | EU369076 | EU369056 | EU369099 | n/a       | EU369018 | EU369035 |
| <i>G. parvula</i>         | BCC48888       | OK040725 | OK040717 | n/a      | NR_182399 | OK040699 | OK040708 |
| <i>G. parvula</i>         | BCC49748       | OK040726 | OK040718 | n/a      | OK040732  | OK040700 | OK040709 |
| <i>G. penicilliioides</i> | GNJ20200812-05 | n/a      | n/a      | n/a      | MW969672  | MW961418 | MW969664 |
| <i>G. penicilliioides</i> | GNJ20200814-11 | n/a      | MZ215998 | MW969650 | MW969669  | MW961415 | MW969661 |
| <i>G. penicilliioides</i> | GNJ20200814-14 | n/a      | MZ215999 | MW969651 | MW969670  | MW961416 | MW969662 |
| <i>G. penicilliioides</i> | GNJ20200814-17 | n/a      | n/a      | MW969652 | MW969671  | MW961417 | MW969663 |
| <i>G. pigmentosinum</i>   | BCC41203       | n/a      | MT503323 | n/a      | MT477071  | MT503330 | n/a      |
| <i>G. pigmentosinum</i>   | BCC41870       | n/a      | MT503324 | n/a      | MT477072  | MT503331 | MT477064 |
| <i>G. pigmentosinum</i>   | BCC38246       | MH521855 | MH521800 | n/a      | MH532872  | MH521893 | MH394672 |
| <i>G. pigmentosinum</i>   | NHJ 11679      | n/a      | EU369054 | n/a      | n/a       | EU369016 | n/a      |
| <i>G. pilosa</i>          | BCC45580       | n/a      | OK040719 | n/a      | OK040733  | OK040701 | OK040710 |
| <i>G. pulchra</i>         | NHJ 10788      | EU369078 | EU369058 | EU369101 | n/a       | EU369019 | EU369036 |
| <i>G. pulchra</i>         | NHJ 5401       | EU369079 | EU369059 | EU369102 | n/a       | n/a      | n/a      |
| <i>G. pulchra</i>         | BCC47555       | n/a      | MH521804 | n/a      | MH532885  | MH521897 | n/a      |
| <i>G. pulchra</i>         | NHJ14150       | n/a      | n/a      | n/a      | HM161739  | HM161729 | n/a      |
| <i>G. pulchra</i>         | EPF083         | n/a      | n/a      | JX192782 | JX192719  | JX192813 | JX192752 |
| <i>G. scorpioides</i>     | BCC45127       | n/a      | n/a      | n/a      | MT477075  | MT503332 | n/a      |
| <i>G. scorpioides</i>     | BCC47514       | n/a      | n/a      | n/a      | MT477076  | MT503333 | n/a      |
| <i>G. scorpioides</i>     | BCC47530       | MT503338 | n/a      | n/a      | MT477077  | MT503334 | MT477065 |
| <i>G. scorpioides</i>     | BCC47976       | MT503339 | MT503325 | n/a      | MT477078  | MT503335 | MT477066 |

|                               |            |          |          |          |          |          |          |
|-------------------------------|------------|----------|----------|----------|----------|----------|----------|
| <i>G. scorpioides</i>         | BCC13020   | n/a      | MH521814 | n/a      | MT477073 | MH521901 | MH394686 |
| <i>G. scorpioides</i>         | BCC27985   | MH521857 | MH521815 | n/a      | n/a      | MH521899 | MH394662 |
| <i>G. scorpioides</i>         | BCC27986   | OK040727 | OK040720 | n/a      | OK040735 | OK040702 | OK040711 |
| <i>G. solita</i>              | BCC45574   | n/a      | OK040721 | n/a      | OK040736 | OK040703 | OK040712 |
| <i>G. trimorpha</i>           | BCC36538   | MH521861 | MH521817 | n/a      | MH532867 | MH521890 | MH394668 |
| <i>G. trimorpha</i>           | BCC36526   | OK040728 | OK040722 | n/a      | OK040737 | OK040704 | n/a      |
| <i>G. unica</i>               | BCC46590   | MH521866 | MH521803 | n/a      | MH532883 | n/a      | MH394678 |
| <i>G. unica</i>               | BCC45112   | n/a      | OK040723 | n/a      | OK040738 | OK040705 | OK040713 |
| <i>Torrubiella</i>            |            |          |          |          |          |          |          |
| <i>arachnophilus</i>          | BCC47888   | MH521864 | MH521802 | n/a      | n/a      | n/a      | n/a      |
| ( <i>G. pulchra</i> )         |            |          |          |          |          |          |          |
| <i>T. arachnophilus</i>       | 1          | n/a      | n/a      | AF327399 | KP685595 | n/a      | AF327391 |
| <i>Torrubiella</i>            |            |          |          |          |          |          |          |
| <i>arachnophilus</i>          | BUG507     | MH879619 | MH885445 | MH879644 | n/a      | n/a      | MH879596 |
| <i>Akanthomyces aculeatus</i> | TS772      | n/a      | n/a      | KC519368 | n/a      | KC519366 | KC519370 |
| <i>A. araneicola</i>          | GY 29011   | MK955947 | MK955944 | n/a      | MK942431 | MK955950 | n/a      |
| <i>A. araneicola</i>          | GY 29012   | MK955948 | MK955945 | n/a      | MK942434 | MK955951 | n/a      |
| <i>A. attenuatus</i>          | CBS 170.76 | OP762615 | OP762611 | n/a      | MH872739 | OP762607 | OP752153 |
| <i>A. attenuatus</i>          | CBS402.78  | EF468935 | EF468888 | AF339614 | AJ292434 | EF468782 | AF339565 |
| <i>A. attenuatus</i>          | KACC42493  | KM283846 | KM283826 | KM283756 | n/a      | KM283804 | KM283780 |
| <i>A. attenuatus</i>          | KACC43049  | KM283847 | KM283827 | KM283757 | n/a      | KM283805 | KM283781 |
| <i>A. coccidioperithecii</i>  | NHJ 6709   | EU369086 | EU369067 | EU369110 | JN049865 | EU369025 | EU369042 |
| <i>A. kanyawimiae</i>         | BCC 34340  | MH521875 | MH521831 | n/a      | MH532862 | MH521909 | MH394666 |
| <i>A. kanyawimiae</i>         | TBRC 7242  | MF140808 | MF140784 | n/a      | MF140751 | MF140838 | MF140718 |
| <i>A. lecanii</i>             | CBS101247  | KM283859 | KM283837 | KM283770 | JN049836 | DQ522359 | KM283794 |
| <i>A. lecanii</i>             | CBS102067  | KM283860 | KM283838 | KM283771 | n/a      | KM283818 | KM283795 |
| <i>A. neocoleopterorum</i>    | GY11241    | MN097812 | MN097816 | n/a      | MN093295 | MN097813 | n/a      |
| <i>A. neocoleopterorum</i>    | GY11242    | MN097814 | MN097817 | n/a      | MN093297 | MN097815 | n/a      |
| <i>A. noctuidarum</i>         | BBH16595   | MT478005 | MT477995 | n/a      | MT356073 | MT477979 | MT356085 |
| <i>A. noctuidarum</i>         | BCC28571   | MT478006 | MT478009 | n/a      | MT356075 | MT477981 | MT356087 |
| <i>A. pyralidarum</i>         | BCC29197   | MT477991 | MT478003 | n/a      | MT356083 | MT508840 | MT356094 |
| <i>A. pyralidarum</i>         | BCC40869   | MT477990 | MT478002 | n/a      | MT356082 | MT477984 | MT356093 |

|                                 |            |          |          |          |           |          |          |
|---------------------------------|------------|----------|----------|----------|-----------|----------|----------|
| <i>A. sulphureus</i>            | TBRC 7247  | MF140811 | MF140785 | n/a      | MF140756  | MF140841 | MF140720 |
| <i>A. sulphureus</i>            | TBRC 7248  | MF140812 | MF140787 | n/a      | MF140758  | MF140843 | MF140722 |
| <i>A. thailandicus</i>          | TBRC 7245  | MF140809 | n/a      | n/a      | MF140754  | MF140839 | n/a      |
| <i>A. thailandicus</i>          | TBRC 7246  | MF140810 | n/a      | n/a      | MF140755  | MF140840 | MF140719 |
| <i>A. tortricidarum</i>         | BCC41868   | MT478008 | MT477998 | n/a      | MT356077  | MT477985 | MT356089 |
| <i>A. tortricidarum</i>         | BCC72638   | MT477992 | MT477997 | n/a      | MT356076  | MT478004 | MT356088 |
| <i>A. tuberculatus</i>          | BCC12869   | n/a      | n/a      | GQ249961 | GQ250007  | GQ250036 | GQ249986 |
| <i>A. tuberculatus</i>          | BCC16819   | n/a      | n/a      | GQ249962 | GQ250012  | GQ250037 | GQ249987 |
| <i>A. waltergamsii</i>          | TBRC 7251  | MF140833 | MF140781 | n/a      | MF140747  | MF140833 | MF140713 |
| <i>A. waltergamsii</i>          | TBRC 7252  | MF140806 | MF140782 | n/a      | NR_164417 | MF140834 | MF140714 |
| <i>A. aculeatus*</i>            | BCC 17075  | n/a      | n/a      | GQ249958 | GQ250011  | GQ250033 | GQ249983 |
| <i>Ascopolyporus albus</i>      | BCC48976   | OL322066 | OL322057 | n/a      | OL331503  | OL322036 | OL322049 |
| <i>Asc. galloides</i>           | BCC25446   | OL322060 | OL322053 | n/a      | OL331510  | OL322029 | OL322042 |
| <i>Asc. galloides</i>           | BCC47981   | OL322061 | OL322054 | n/a      | OL331511  | OL322030 | OL322043 |
| <i>Asc. griseoperitheciatus</i> | BCC22358   | OL322067 | n/a      | n/a      | OL331507  | OL322037 | OL322050 |
| <i>Asc. griseoperitheciatus</i> | BCC25788   | OL322068 | OL322058 | n/a      | OL331508  | OL322038 | OL322051 |
| <i>Asc. purpuratus</i>          | BCC88388   | OL322064 | n/a      | n/a      | OL331505  | OL322033 | OL322046 |
| <i>Asc. purpuratus</i>          | BCC88430   | OL322063 | OL322059 | n/a      | OL331506  | OL322032 | OL322045 |
| <i>Asc. albus</i>               | BCC48975   | OL322065 | OL322056 | n/a      | OL331502  | OL322035 | OL322048 |
| <i>Beauveria acridophila</i>    | MCA 1181   | n/a      | MF416628 | MF416574 | n/a       | n/a      | MF416522 |
| <i>B. amorpha</i>               | ARSEF 4149 | HQ880948 | HQ880876 | n/a      | HQ880804  | HQ881006 | n/a      |
| <i>B. asiatica</i>              | BUB824     | MG642878 | MG642863 | MG642893 | MG642836  | MG642908 | MG642850 |
| <i>B. australis</i>             | ARSEF 4622 | HQ880934 | HQ880862 | n/a      | HQ880790  | HQ880996 | n/a      |
| <i>B. australis</i>             | ARSEF 4580 | HQ880932 | HQ880860 | n/a      | HQ880788  | HQ880994 | n/a      |
| <i>B. bassiana**</i>            | ARSEF 1564 | HQ880905 | HQ880833 | n/a      | GU734762  | HQ880974 | n/a      |
| <i>B. brongniartii</i>          | ARSEF 6215 | HQ880925 | HQ880853 | n/a      | HQ880781  | HQ880990 | n/a      |
| <i>B. brongniartii</i>          | ARSEF 7058 | HQ880917 | HQ880845 | n/a      | HQ880773  | HQ880983 | n/a      |
| <i>B. brongniartii</i>          | ARSEF 7268 | HQ880916 | HQ880844 | n/a      | HQ880772  | HQ880982 | n/a      |
| <i>B. brongniartii</i>          | BCC 16585  | JF415991 | JN049885 | JF415951 | JN049867  | JF416009 | JF415967 |
| <i>B. caledonica</i>            | ARSEF 2567 | HQ880961 | EF469086 | AF339570 | HQ880817  | EF469057 | AF339520 |
| <i>B. caledonica</i>            | BUB421     | MG642873 | MG642858 | MG642888 | MG642831  | MG642903 | MG642845 |
| <i>B. locustiphila</i>          | TS 881     | JX003845 | JX003847 | JQ895525 | JQ958606  | JQ958619 | JQ895535 |

|                                    |              |          |          |           |           |          |           |
|------------------------------------|--------------|----------|----------|-----------|-----------|----------|-----------|
| <i>B. malawiensis</i>              | BCC 20195    | MN401602 | MN401546 | n/a       | MN401622  | MN401448 | n/a       |
| <i>B. malawiensis</i>              | BUB444       | MG642875 | MG642860 | MG642890  | MG642833  | MG642905 | MG642847  |
| <i>B. pseudobassiana</i>           | BUB506       | MG642876 | MG642861 | MG642891  | MG642834  | MG642906 | MG642848  |
| <i>B. pseudobassiana</i>           | YNHHCS1      | MH458410 | MH458402 | MH458406  | n/a       | MH458404 | MH458408  |
| <i>B. scarabaeidicola</i>          | ARSEF 5689   | DQ522431 | DQ522380 | AF339574  | AY245639  | DQ522335 | AF339524  |
| <i>B. sinensis</i>                 | BUB51        | MG642864 | MG642851 | MG642879  | MG642824  | MG642894 | MG642837  |
| <i>B. amorpha</i>                  | ARSEF 7542   | HQ880949 | HQ880877 | n/a       | HQ880805  | HQ881007 | n/a       |
| <i>Blackwellomyces aurantiacus</i> | BCC 85061    | MT017820 | MK411601 | n/a       | MT000693  | MK411599 | MT003029  |
| <i>Bla. calendulinus</i>           | BCC68500     | MT017821 | MT017802 | n/a       | MT000694  | MT017842 | MT003030  |
| <i>Bla. calendulinus</i>           | BCC68502     | MT017822 | MT017803 | n/a       | MT000695  | MT017843 | MT003031  |
| <i>Bla. cardinalis</i>             | OSC 93610    | EF469106 | EF469088 | AY184973  | JN049843  | EF469059 | AY184963  |
| <i>Bla. cardinalis*</i>            | OSC 93609    | DQ522422 | DQ522370 | AY184974  | n/a       | DQ522325 | AY184962  |
| <i>Bla. lateris</i>                | MFLU 18-0663 | MK079354 | MK084615 | NG_067678 | NR_166258 | MK069471 | NG_067857 |
| <i>Bla. minutus</i>                | BCC 88269    | MT017823 | MT017804 | n/a       | MT000696  | MT017844 | MT003032  |
| <i>Bla. pseudomilitaris</i>        | NBRC 101409  | n/a      | JN992482 | JN941748  | JN943305  | n/a      | JN941393  |
| <i>Bla. pseudomilitaris</i>        | NBRC 101410  | n/a      | JN992481 | JN941747  | JN943307  | n/a      | JN941394  |
| <i>Bla. roseostromatus</i>         | BCC 91358    | MT017824 | MT017805 | n/a       | MT000697  | MT017845 | MT003033  |
| <i>Bla. roseostromatus</i>         | BCC 91359    | MT017825 | MT017806 | n/a       | MT000698  | MT017846 | MT003034  |
| <i>Bla. aurantiacus</i>            | BCC 85060    | MT017819 | MK411600 | n/a       | MT000692  | MK411598 | MT003028  |
| <i>Cordyceps araneae</i>           | BCC85066     | MT017829 | MT017811 | n/a       | MT000703  | MT017851 | MT003038  |
| <i>C. cateniobliqua</i>            | YFCC 3367    | MN576935 | MN576881 | MN576765  | n/a       | MN576991 | MN576821  |
| <i>C. cateniobliqua</i>            | YFCC 5935    | MN576936 | MN576882 | MN576766  | n/a       | MN576992 | MN576822  |
| <i>C. fumosorosea</i>              | CBS 107.10   | MG665237 | n/a      | n/a       | AY624184  | n/a      | MG665227  |
| <i>C. fumosorosea</i>              | CBS 375.70   | MG665238 | n/a      | n/a       | MH859721  | n/a      | MG665229  |
| <i>C. javanica</i>                 | CBS 134.22   | MF416455 | MF416661 | MF416610  | MH854719  | MF416504 | MG665231  |
| <i>C. javanica</i>                 | TBRC 7260    | MF140803 | MF140779 | n/a       | MF140744  | MF140830 | MF140710  |
| <i>C. lepidopterorum</i>           | TBRC 7263    | MF140792 | MF140768 | n/a       | MF140765  | MF140819 | NG_067804 |
| <i>C. lepidopterorum</i>           | TBRC 7264    | MF140793 | MF140769 | n/a       | MF140766  | MF140820 | MF140700  |
| <i>C. longiphialis</i>             | YFCC 8402    | OL473536 | OL739571 | NG_148882 | n/a       | OL473525 | OL468577  |
| <i>C. longiphialis</i>             | YFCC 8403    | OL473537 | OL739572 | OL468558  | n/a       | OL473526 | OL468578  |
| <i>C. militaris</i>                | OSC 93623    | n/a      | DQ522377 | AY184977  | JN049825  | DQ522332 | AY184966  |



|                                   |               |          |          |           |           |          |           |
|-----------------------------------|---------------|----------|----------|-----------|-----------|----------|-----------|
| <i>C. nidus</i>                   | TS903C        | n/a      | KY360296 | KY360300  | n/a       | n/a      | KY360293  |
| <i>C. pruinosa</i>                | ARSEF 5413    | DQ522451 | Q522397  | AY84979   | JN049826  | DQ522351 | AY84968   |
| <i>C. simaoensis</i>              | YFCC 8407     | OL473541 | OL739576 | OL468562  | n/a       | OL473530 | OL468582  |
| <i>C. simaoensis</i>              | YFCC 8408     | OL473542 | OL739577 | OL468563  | n/a       | OL473531 | OL468583  |
| <i>C. subtenuipes</i>             | YFCC 6051     | MN576891 | MN576835 | MN576719  | n/a       | MN576945 | MN576755  |
| <i>C. subtenuipes</i>             | YFCC 6084     | MN576892 | MN576836 | MN576720  | n/a       | MN576946 | MN576776  |
| <i>C. tenuipes</i>                | ARSEF 5135    | JF416000 | JN049896 | MF416612  | AY624196  | KY973654 | JF415980  |
| <i>C. tenuipes</i>                | BCC33299      | MH521877 | MH521838 | n/a       | MH532860  | n/a      | MH394664  |
| <i>C. tenuipes</i>                | BCC34337      | MH521878 | MH521839 | n/a       | MH532861  | n/a      | MH394665  |
| <i>C. araneae</i>                 | BCC85065      | MT017828 | MT017810 | n/a       | MT000702  | MT017850 | MT003037  |
| <i>Engyodontium rectidentatum</i> | CBS 641.74    | n/a      | n/a      | n/a       | LC092895  | LC425540 | LC092914  |
| <i>Eng. rectidentatum</i>         | CBS 547.82    | n/a      | n/a      | n/a       | LC092894  | LC425544 | LC092913  |
| <i>Flavocillium bifurcatum*</i>   | YFCC 6101     | MN576897 | MN576841 | MN576725  | MN576833  | MN576951 | MN576781  |
| <i>Fla. subprimulinum</i>         | KUMCC 17-0144 | n/a      | n/a      | MG585320  | MG585318  | MG585321 | MG585319  |
| <i>Fla. subprimulinum</i>         | KUMCC 17-0148 | n/a      | n/a      | MG585316  | MG585314  | MG585317 | MG585315  |
| <i>Fla. subprimulinum</i>         | JCM 18525     | n/a      | n/a      | NG_073501 | NR_119418 | LC557125 | NG_067516 |
| <i>Fla. acerosum</i>              | CBS418.81     | KM283852 | KM283832 | KM283762  | EF641893  | KM283810 | KM283786  |
| <i>Gam. lunata</i>                | LC12546       | MK335982 | n/a      | n/a       | n/a       | MK336030 | n/a       |
| <i>Gamszarea microspora</i>       | CGMCC3.19313  | n/a      | n/a      | NG_074898 | NR_172832 | n/a      | NG_075269 |
| <i>Gam. microspora</i>            | LC12531       | MK335984 | n/a      | n/a       | n/a       | MK336032 | n/a       |
| <i>Gam. wallacei*</i>             | CBS 101237    | EF469119 | EF469102 | NG_062646 | NR_111267 | EF469073 | NG_042398 |
| <i>Gam. humicola</i>              | LC12462       | MK335980 | n/a      | n/a       | n/a       | MK336028 | n/a       |
| <i>Hevansia arachnophila</i>      | NHJ2465       | ON470207 | ON470205 | n/a       | MH532899  | MH521916 | n/a       |
| <i>H. arachnophila</i>            | NHJ2633       | MH521884 | MH521843 | n/a       | MH532900  | MH521917 | n/a       |
| <i>H. cinerea</i>                 | BCC02191      | n/a      | n/a      | GQ249956  | GQ250000  | GQ250029 | GQ249971  |
| <i>H. cinerea</i>                 | BCC47914      | MH521851 | MH521821 | n/a       | n/a       | MH521888 | MH394652  |
| <i>H. cinerea</i>                 | BCC47913      | MH521850 | MH521820 | n/a       | n/a       | n/a      | MH394651  |
| <i>H. koratensis</i>              | BCC01485      | ON470208 | ON470206 | GQ249957  | GQ250010  | GQ250031 | GQ249981  |
| <i>H. minuta</i>                  | MY060537.01   | MZ707833 | MZ707826 | n/a       | n/a       | MZ707811 | n/a       |
| <i>H. minuta</i>                  | MY060537.02   | MZ707834 | MZ707827 | n/a       | n/a       | MZ707812 | n/a       |

|                                            |               |          |          |           |           |          |           |
|--------------------------------------------|---------------|----------|----------|-----------|-----------|----------|-----------|
| <i>H. nelumboides</i>                      | BCC2093       | MF416437 | n/a      | MF416583  | n/a       | MF416473 | MF416530  |
| <i>H. nelumboides</i>                      | BCC 41864     | n/a      | n/a      | JN201863  | JN201871  | JN201867 | JN201873  |
| <i>H. novoguineensis</i>                   | BCC22910      | n/a      | n/a      | GQ249953  | GQ250003  | GQ250024 | GQ249974  |
| <i>H. novoguineensis</i>                   | NHJ11923      | EU369072 | EU369052 | EU369095  | n/a       | EU369013 | EU369032  |
| <i>H. novoguineensis</i>                   | CBS 610.80    | MH521844 | n/a      | n/a       | MH532831  | MH521885 | MH394646  |
| <i>H. novoguineensis*</i>                  | BCC22857      | n/a      | n/a      | GQ249952  | GQ250002  | GQ250023 | GQ249973  |
| <i>H. websteri</i>                         | BCC36541      | MH521849 | MH521811 | n/a       | MH532868  | MH521889 | MH394669  |
| <i>H. websteri</i>                         | BCC23860      | n/a      | n/a      | GQ249954  | GQ250009  | GQ250030 | GQ249979  |
| <i>Hev. arachnophila</i>                   | NHJ 10469     | n/a      | EU369047 | EU369090  | n/a       | EU369008 | EU369031  |
| <i>Jenniferia griseocinerea</i>            | BCC 54893     | n/a      | n/a      | n/a       | MZ684093  | n/a      | MZ684008  |
| <i>Jen. griseocinerea</i>                  | MY06006.01    | MZ707837 | MZ707828 | n/a       | n/a       | MZ707815 | n/a       |
| <i>Jen. thomisidarum</i>                   | BCC 48932     | n/a      | n/a      | n/a       | MZ684095  | n/a      | MZ684012  |
| <i>Jen. thomisidarum</i>                   | BCC 54482     | n/a      | n/a      | n/a       | MZ684097  | n/a      | MZ684014  |
| <i>Jen. thomisidarum*</i>                  | MY05032.02    | MZ707844 | MZ707831 | n/a       | n/a       | MZ707824 | n/a       |
| <i>Jen. griseocinerea</i>                  | BCC 42062     | n/a      | n/a      | n/a       | MZ684091  | n/a      | MZ684006  |
| <i>Lecanicillium aphanocladii</i>          | CBS797.84     | KM283853 | KM283833 | KM283763  | n/a       | KM283811 | KM283787  |
| <i>L. aphanocladii</i>                     | IFM 64743     | n/a      | n/a      | LC553289  | LC553279  | LC553294 | LC553284  |
| <i>L. araneogenum</i>                      | GZU1031Lea    | KX845701 | KX845699 | KX845705  | n/a       | KX845697 | KX845703  |
| <i>L. araneogenum</i>                      | GZU1032Lea    | KX845702 | KX845700 | KX845706  | n/a       | KX845698 | KX845704  |
| <i>L. coprophilum</i>                      | CGMCC 3.18986 | n/a      | n/a      | NG_065751 | NR_163303 | n/a      | NG_067818 |
| <i>L. coprophilum</i>                      | TBS419        | MH177623 | MH177621 | MH177626  | MH177615  | MH184586 | MH177618  |
| <i>L. dimorphum</i>                        | CBS345.37     | KM283854 | KM283834 | KM283764  | n/a       | KM283812 | KM283788  |
| <i>L. flavidum</i>                         | CBS300.70D    | KM283855 | n/a      | KM283765  | MH859668  | KM283813 | KM283789  |
| <i>L. flavidum</i>                         | CBS342.80     | n/a      | n/a      | KM283766  | EF641878  | KM283814 | KM283790  |
| <i>L. fungicola</i> var. <i>aleophilum</i> | CBS357.80     | KM283856 | KM283835 | KM283767  | n/a       | KM283815 | KM283791  |
| <i>L. fusisporum</i>                       | CBS164.70     | KM283858 | KM283836 | KM283769  | NR_111100 | KM283817 | AF339549  |
| <i>L. huhutii</i>                          | GZUIFRhuhu    | MT006063 | MT006058 | MN963916  | MN944445  | MT006068 | n/a       |
| <i>L. longisporum</i>                      | CBS102072     | KM283861 | KM283839 | KM283772  | n/a       | KM283819 | KM283796  |
| <i>L. longisporum</i>                      | CBS126.27     | KM283862 | KM283840 | KM283773  | OP756342  | KM283820 | KM283797  |
| <i>L. magnisporum</i>                      | CGMCC3.19304  | n/a      | n/a      | NG_074899 | NR_172833 | n/a      | NG_075270 |

|                              |            |          |          |           |           |          |           |
|------------------------------|------------|----------|----------|-----------|-----------|----------|-----------|
| <i>L. muscarium</i>          | CBS 143.62 | KM283863 | KM283841 | KM283774  | n/a       | KM283821 | NG_058106 |
| <i>L. pissodis</i>           | BBC7       | MT027509 | MT027506 | MT004819  | MT004829  | MT027503 | MT004835  |
| <i>L. pissodis</i>           | CBS118231  | KM283864 | KM283842 | KM283775  | n/a       | KM283822 | KM283799  |
| <i>L. praecognitum</i>       | MGC39      | MT267525 | n/a      | MT247062  | MT247058  | MT267523 | MT247060  |
| <i>L. praecognitum</i>       | WA67215    | n/a      | n/a      | NG_070677 | NR_173935 | n/a      | NG_081473 |
| <i>L. psalliotae</i>         | CBS101270  | EF469113 | EF469095 | AF339607  | n/a       | EF469066 | AF339558  |
| <i>L. psalliotae</i>         | CBS532.81  | EF469112 | EF469096 | AF339609  | JN049846  | EF469067 | AF339560  |
| <i>L. tenuipes</i>           | CBS30985   | DQ522439 | KM283844 | KM283778  | JN036556  | DQ522341 | KM283802  |
| <i>L. uredinophilum</i>      | CEP 054    | OP762612 | OP762608 | n/a       | n/a       | n/a      | OP752150  |
| <i>L. antillanum</i>         | CBS350.85  | DQ522450 | DQ522396 | AF339585  | NR_111097 | DQ522350 | AF339536  |
| <i>Leptobacillium</i>        |            |          |          |           |           |          |           |
| <i>leptobactrum</i>          | CBS 774.69 | n/a      | n/a      | n/a       | MH859421  | n/a      | MH871192  |
| <i>Lep. leptobactrum*</i>    | CBS 775.69 | n/a      | n/a      | n/a       | MH859422  | n/a      | MH871193  |
| <i>Lep. filiforme</i>        | URM 7918   | n/a      | n/a      | n/a       | NR_171744 | n/a      | NG_075252 |
| <i>Liangia sinensis</i>      | YFCC 3103  | MN576898 | MN576842 | MN576726  | MN576831  | MN576952 | MN576782  |
| <i>Lia. sinensis*</i>        | YFCC 3104  | MN576899 | MN576843 | MN576727  | MN576832  | MN576953 | MN576783  |
| <i>Microhilum oncoperae*</i> | ARSEF 4358 | EF468936 | EF468891 | AF339581  | n/a       | EF468785 | AF339532  |
| <i>Neotorrubiella</i>        |            |          |          |           |           |          |           |
| <i>chinghridicola</i>        | BCC80733   | MK632149 | MK632176 | MK632121  | MK632039  | n/a      | MK632097  |
| <i>Neo. chinghridicola*</i>  | BCC39684   | MK632148 | MK632181 | MK632122  | MK632038  | MK632071 | MK632096  |
| <i>Niveomyces coronatus</i>  | NY04434800 | ON513400 | ON513399 | ON493547  | n/a       | ON513397 | ON493606  |
| <i>Ophiocordyceps</i>        |            |          |          |           |           |          |           |
| <i>caloceroides</i>          | MCA 2249   | n/a      | MF416632 | MF416578  | n/a       | MF416470 | MF416525  |
| <i>O. gracilis</i>           | EFCC 8572  | EF468912 | EF468859 | EF468956  | JN049851  | EF468751 | EF468811  |
| <i>O. salganeicola</i>       | Mori01     | MT759580 | MT759578 | MT741705  | n/a       | MT759575 | MT741719  |
| <i>Parengyodontium album</i> | CBS368.72  | n/a      | n/a      | n/a       | MH860502  | LC382183 | MH872217  |
| <i>Phytocordyceps</i>        |            |          |          |           |           |          |           |
| <i>ninchukispora</i>         | EGS 38.165 | n/a      | EF468900 | EF468991  | n/a       | EF468795 | EF468846  |
| <i>Phy.ninchukispora</i>     | EGS 38.166 | n/a      | EF468901 | EF468992  | n/a       | EF468794 | EF468847  |
| <i>Pleurodesmospora</i>      |            |          |          |           |           |          |           |
| <i>coccorum*</i>             | CBS 460.73 | n/a      | n/a      | n/a       | MH860743  | n/a      | MH872455  |
| <i>Ple. lepidopterorum</i>   | DY10501    | MW834316 | MW834315 | n/a       | MW826577  | MW834317 | n/a       |

|                                    |            |          |          |           |          |          |           |
|------------------------------------|------------|----------|----------|-----------|----------|----------|-----------|
| <i>Ple. coccorum</i>               | CBS 459.73 | n/a      | n/a      | n/a       | MH860742 | n/a      | MH872454  |
| <i>Polystromomyces araneae</i>     | MY12684    | MZ707845 | MZ707832 | n/a       | n/a      | MZ707825 | n/a       |
| <i>Pseudogibbellula formicarum</i> | BCC 81493  | n/a      | MT533472 | n/a       | n/a      | MT863566 | MT512652  |
| <i>P. formicarum</i>               | BCC 84257  | n/a      | MT533473 | n/a       | n/a      | MT533480 | MT512653  |
| <i>P. formicarum</i>               | CBS 433.73 | n/a      | n/a      | n/a       | AY945231 | n/a      | n/a       |
| <i>P. formicarum</i>               | CBS 871.72 | n/a      | MT533474 | n/a       | n/a      | MT863565 | MH878295  |
| <i>Samsoniella alpina</i>          | YFCC 5818  | MN576923 | MN576869 | MN576753  | n/a      | MN576979 | MN576809  |
| <i>Sam. alpina</i>                 | YFCC 5831  | MN576924 | MN576870 | MN576754  | n/a      | MN576980 | MN576810  |
| <i>Sam. antleroides</i>            | YFCC 6016  | MN576917 | MN576863 | MN576747  | n/a      | MN576973 | MN576803  |
| <i>Sam. antleroides</i>            | YFCC 6113  | MN576918 | MN576864 | MN576748  | n/a      | MN576974 | MN576804  |
| <i>Sam. aurantia</i>               | TBRC 7271  | MF140818 | MF140791 | n/a       | MF140764 | MF140846 | MF140728  |
| <i>Sam. aurantia</i>               | TBRC 7272  | MF140817 | n/a      | n/a       | MF140763 | MF140845 | MF140727  |
| <i>Sam. cardinalis</i>             | YFCC 5830  | MN576902 | MN576848 | MN576732  | n/a      | MN576958 | MN576788  |
| <i>Sam. cardinalis</i>             | YFCC 6144  | MN576900 | MN576846 | NG_077413 | n/a      | MN576956 | MN576786  |
| <i>Sam. coccinellidicola</i>       | YFCC 8772  | ON568685 | ON676502 | ON563166  | n/a      | ON676514 | ON621670  |
| <i>Sam. coccinellidicola</i>       | YFCC 8773  | ON568686 | ON676503 | ON563167  | n/a      | ON676515 | ON621671  |
| <i>Sam. cristata</i>               | YFCC 6023  | MN576906 | MN576852 | MN576736  | n/a      | MN576962 | MN576792  |
| <i>Sam. cristata</i>               | YFCC 7004  | MN576907 | MN576853 | NG_077415 | n/a      | MN576963 | MN576793  |
| <i>Sam. farinospora</i>            | YFCC 8774  | ON568687 | ON676504 | ON563168  | n/a      | ON676516 | ON621672  |
| <i>Sam. farinospora</i>            | YFCC 9051  | ON568688 | ON676505 | ON563169  | n/a      | ON676517 | ON621673  |
| <i>Sam. haniana</i>                | YFCC 8769  | ON568689 | ON676506 | ON563170  | n/a      | ON676518 | ON621674  |
| <i>Sam. haniana</i>                | YFCC 8770  | ON568690 | ON676507 | ON563171  | n/a      | ON676519 | ON621675  |
| <i>Sam. hepiali</i>                | YFCC 7024  | MN576911 | MN576857 | MN576741  | n/a      | MN576967 | MN576797  |
| <i>Sam. hepiali</i>                | YFCC 7215  | MN576912 | MN576858 | MN576742  | n/a      | MN576968 | MN576798  |
| <i>Sam. inthanonensis</i>          | TBRC 7270  | MF140813 | MF140788 | n/a       | MF140759 | MF140847 | MF140723  |
| <i>Sam. inthanonensis</i>          | TBRC 7915  | MF140815 | MF140790 | n/a       | MF140761 | MF140849 | MF140723  |
| <i>Sam. kunmingensis</i>           | YHH 16002  | MN576916 | MN576862 | MN576746  | n/a      | MN576972 | NG_079657 |
| <i>Sam. lanmaoa</i>                | YFCC 6193  | MN576904 | MN576850 | MN576734  | n/a      | MN576960 | MN576790  |
| <i>Sam. lanmaoa</i>                | YFCC 6148  | MN576903 | MN576849 | MN576733  | n/a      | MN576959 | MN576789  |
| <i>Sam. pseudotortricidae</i>      | YFCC 9052  | ON568692 | ON676509 | ON563173  | n/a      | ON676521 | ON621677  |

|                                    |                |          |          |           |           |          |           |
|------------------------------------|----------------|----------|----------|-----------|-----------|----------|-----------|
| <i>Sam. pseudotortricidae</i>      | YFCC 9053      | ON568693 | ON676510 | ON563174  | n/a       | ON676522 | ON621678  |
| <i>Sam. ramosa</i>                 | YFCC 6020      | MN576919 | MN576865 | MN576749  | n/a       | MN576975 | MN576805  |
| <i>Sam. tortricidae</i>            | YFCC 6013      | MN576921 | MN576867 | MN576751  | n/a       | MN576977 | MN576807  |
| <i>Sam. tortricidae</i>            | YFCC 6131      | MN576920 | MN576866 | NG_077418 | n/a       | MN576976 | MN576806  |
| <i>Sam. yunnanensis</i>            | YFCC 1527      | MN576926 | MN576872 | NG_077420 | n/a       | MN576982 | MN576812  |
| <i>Sam. yunnanensis</i>            | YFCC 1824      | MN576927 | MN576873 | MN576757  | n/a       | MN576983 | MN576813  |
| <i>Sam. alboaurantia</i>           | BBC5           | MT027508 | n/a      | MT004818  | MT004827  | MT027502 | MT004834  |
| <i>Simplicillium aogashimaense</i> | JCM 18167      | n/a      | n/a      | NG_068378 | NR_111026 | LC496904 | NG_068547 |
| <i>Sim. cylindrosporum</i>         | JCM 18169      | n/a      | n/a      | NG_068379 | NR_111023 | LC496906 | NG_069476 |
| <i>Sim. formicae</i>               | MFLUCC 18-1379 | n/a      | MK882623 | NG_070121 | NR_168789 | MK926451 | NG_068624 |
| <i>Sim. lamellicola</i>            | CBS 116.25     | DQ522464 | DQ522404 | AF339601  | NR_111098 | DQ522356 | NG_042381 |
| <i>Sim. lamellicola</i>            | JC-1           | n/a      | n/a      | MT807908  | MT807906  | MT826785 | MT807907  |
| <i>Sim. lanosoniveum</i>           | CG888          | n/a      | n/a      | MT081951  | MT081944  | MT140365 | MT081957  |
| <i>Sim. lanosoniveum</i>           | CG889          | n/a      | n/a      | MT081952  | MT081943  | MT140366 | MT081958  |
| <i>Sim. lanosoniveum</i> *         | CBS 704.86     | DQ522464 | DQ522406 | AF339602  | n/a       | DQ522358 | AF339553  |
| <i>Sim. minatense</i>              | JCM 18176      | n/a      | n/a      | NG_068380 | NR_111025 | LC496908 | NG_069477 |
| <i>Sim. niveum</i>                 | BCC83036       | n/a      | MW603489 | n/a       | MW621499  | MW603488 | MW620992  |
| <i>Sim. obclavatum</i>             | CBS 311.74     | n/a      | n/a      | NG_062627 | NR_111099 | EF468798 | NG_042535 |
| <i>Sim. subtropicum</i>            | JCM 18180      | n/a      | n/a      | LC496895  | NR_111024 | LC496910 | LC496880  |
| <i>Sim. sympodiophorum</i>         | JCM 18184      | n/a      | n/a      | NG_068382 | NR_111027 | LC496912 | NG_068548 |
| <i>Sim. yunnanense</i>             | YFCC 7133      | n/a      | MN576844 | NG_077412 | n/a       | MN576954 | MN576784  |
| <i>Sim. yunnanense</i>             | YFCC 7134      | n/a      | MN576845 | MN576729  | n/a       | MN576955 | MN576785  |
| <i>Sim. aogashimaense</i>          | JCM 18168      | n/a      | n/a      | LC496890  | AB604004  | LC496905 | LC496875  |

**Table S5.** Nucleotide substitution models and partitions selected based on Bayesian Information Criterion (BIC) in ModelFinder [9] and Partition Models [10].

| Partition | Genomic region   | Substitution Models | Sequences | Unique site patterns | Informative sites | Invariant sites | Constant sites |
|-----------|------------------|---------------------|-----------|----------------------|-------------------|-----------------|----------------|
| 1         | SSU              | K2P+I+G4            | 164       | 476                  | 222               | 720             | 720            |
| 2         | LSU              | SYM++I+G4           | 257       | 763                  | 419               | 726             | 726            |
| 3         | TEF- <i>RPB1</i> | TIM2 +F+I+G4        | 250       | 1247                 | 880               | 899             | 899            |
| 4         | <i>RPB2</i>      | TIM +F+I+G4         | 285       | 820                  | 519               | 559             | 559            |
| 5         | ITS              | GTR+F++I+G4         | 206       | 583                  | 504               | 145             | 145            |

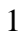

3

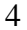



5

1

## 2 References

18

- 19 *Methods and Application*; Innis, M.A., Gelfand, D.H., Sninsky, J.J., White, T.J., Eds.;  
20 Elsevier, Academic Press: New York, 1990; pp. 315–322.
- 21 3. Vilgalys, R.; Sun, B.L. Ancient and Recent Patterns of Geographic Speciation in the  
22 Oyster Mushroom *Pleurotus* Revealed by Phylogenetic Analysis of Ribosomal DNA  
23 Sequences. *Proc. Natl. Acad. Sci.* **1994**, *91*, 4599–4603, doi:10.1073/pnas.91.10.4599.
- 24 4. Vilgalys, R.; Hester, M. Rapid Genetic Identification and Mapping of Enzymatically  
25 Amplified Ribosomal DNA from Several *Cryptococcus* Species. *J. Bacteriol.* **1990**,  
26 *172*, 4238–4246, doi:10.1128/jb.172.8.4238-4246.1990.
- 27 5. Castlebury, L.A.; Rossman, A.Y.; Sung, G.-H.; Hyten, A.S.; Spatafora, J.W. Multigene  
28 Phylogeny Reveals New Lineage for *Stachybotrys Chartarum*, the Indoor Air Fungus.  
29 *Mycological Research* **2004**, *108*, 864–872, doi:10.1017/S0953756204000607.
- 30 6. Murata, N.; Aoki, T.; Kusaba, M.; Tosa, Y.; Chuma, I. Various Species of Pyricularia  
31 Constitute a Robust Clade Distinct from Magnaporthe Salvinii and Its Relatives in  
32 Magnaporthaceae. *J Gen Plant Pathol* **2014**, *80*, 66–72, doi:10.1007/s10327-013-0477-  
33 z.
- 34 7. Liu, Y.J.; Whelen, S.; Hall, B.D. Phylogenetic Relationships among Ascomycetes:  
35 Evidence from an RNA Polymerase II Subunit. *Molecular Biology and Evolution* **1999**,  
36 *16*, 1799–1808, doi:10.1093/oxfordjournals.molbev.a026092.
- 37 8. Araújo, J.P.M.; Evans, H.C.; Kepler, R.; Hughes, D.P. Zombie-Ant Fungi across  
38 Continents: 15 New Species and New Combinations within *Ophiocordyceps*. I.  
39 Myrmecophilous Hirsutelloid Species. *Studies in Mycology* **2018**, *90*, 119–160,  
40 doi:10.1016/j.simyco.2017.12.002.
- 41 9. Kalyaanamoorthy, S.; Minh, B.Q.; Wong, T.K.F.; von Haeseler, A.; Jermini, L.S.  
42 ModelFinder: Fast Model Selection for Accurate Phylogenetic Estimates. *Nat Methods*  
43 **2017**, *14*, 587–589, doi:10.1038/nmeth.4285.
- 44 10. Chernomor, O.; von Haeseler, A.; Minh, B.Q. Terrace Aware Data Structure for  
45 Phylogenomic Inference from Supermatrices. *Syst Biol* **2016**, *65*, 997–1008,  
46 doi:10.1093/sysbio/syw037.
- 47
